# Supplementary material for: Dual Effect of Glucuronidation of a Pyrogallol-Type Phytophenol Antioxidant: A Comparison between Scutellarein and Scutellarin
Source: MDPI journal article supplement (doi:10.3390/molecules23123225), 2018-12-06

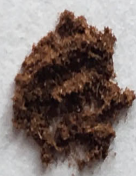

*Scutellarein*  
CAS 529-53-3

## CERTIFICATE OF ANALYSIS

**BBP No.:** BBP04027

**CAS No.:** 529-53-3

**Chemical Name:** Scutellarein

**Molecular Formula:** C<sub>15</sub>H<sub>10</sub>O<sub>6</sub>

**Structure:**

**Purity:** 98%

**Appearance:** Brown powder

**Solvent:** Dimethyl sulfoxide, methanol

**Exact Weight:** 5.1 mg

**Storage:** Store in a dark place under the temperature of 0-4 °C

**Intended Use:** For laboratory use only

**Reference:** H. J. Xia, Biol Pharm Bull, 2007, 30(7), 1308-1316

**Warm Notice:** When publishing, please cite as: chemical name was purchased from BioBioPha Co., Ltd. (Kunming, China)

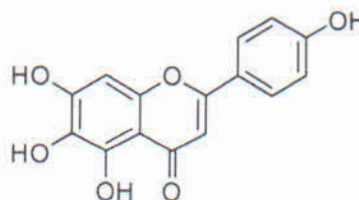

### Characterization Data Summary

| Analytical Test                           | Results                             |
|-------------------------------------------|-------------------------------------|
| Identification by <sup>1</sup> H-NMR      | Consistent with the above structure |
| Purity tested by HPLC, <sup>1</sup> H-NMR | 98%                                 |

**Authorized Signature:** 7.11.29

**Date:**

PASS



## PRODUCT QUALITY REPORT

Product Number: BBP04027

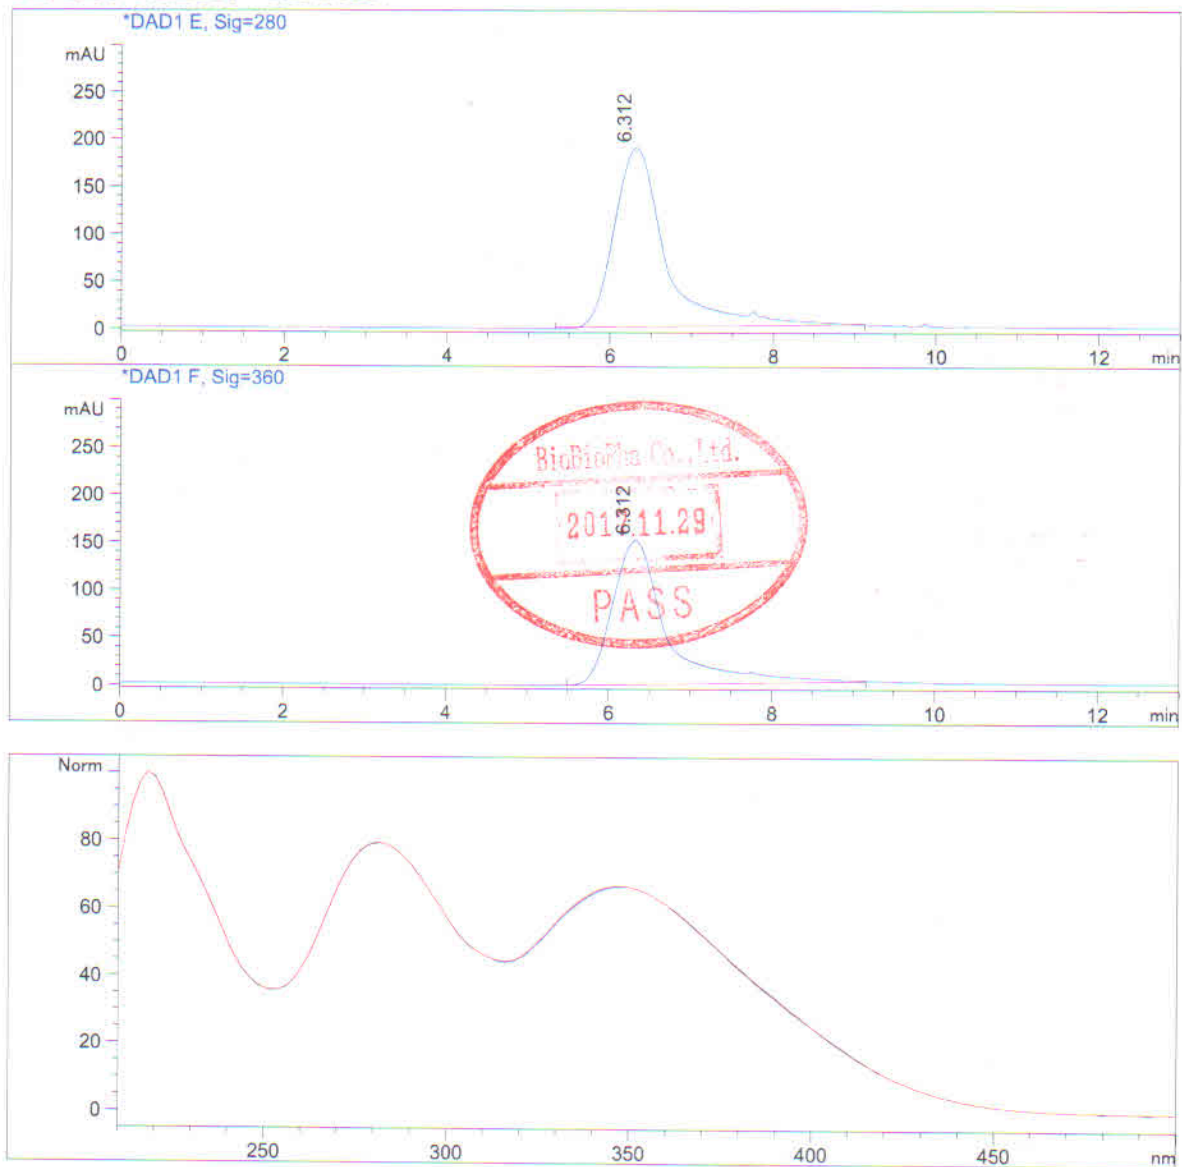

Agilent 1200 series HPLC system  
Thermo Hypersil BDS C18 column (5  $\mu$ m, 4.6  $\times$  150 mm)  
20%  $\rightarrow$  100% MeOH in H<sub>2</sub>O over 8.0 min followed by 100% MeOH to 13.0 min  
1.0 ml/min, 25°C

DMSO-d<sub>6</sub>, 500 MHz

12.778

10.480  
10.327

7.909  
7.896  
7.892

6.914  
6.900  
6.896  
6.731  
6.566

2.490

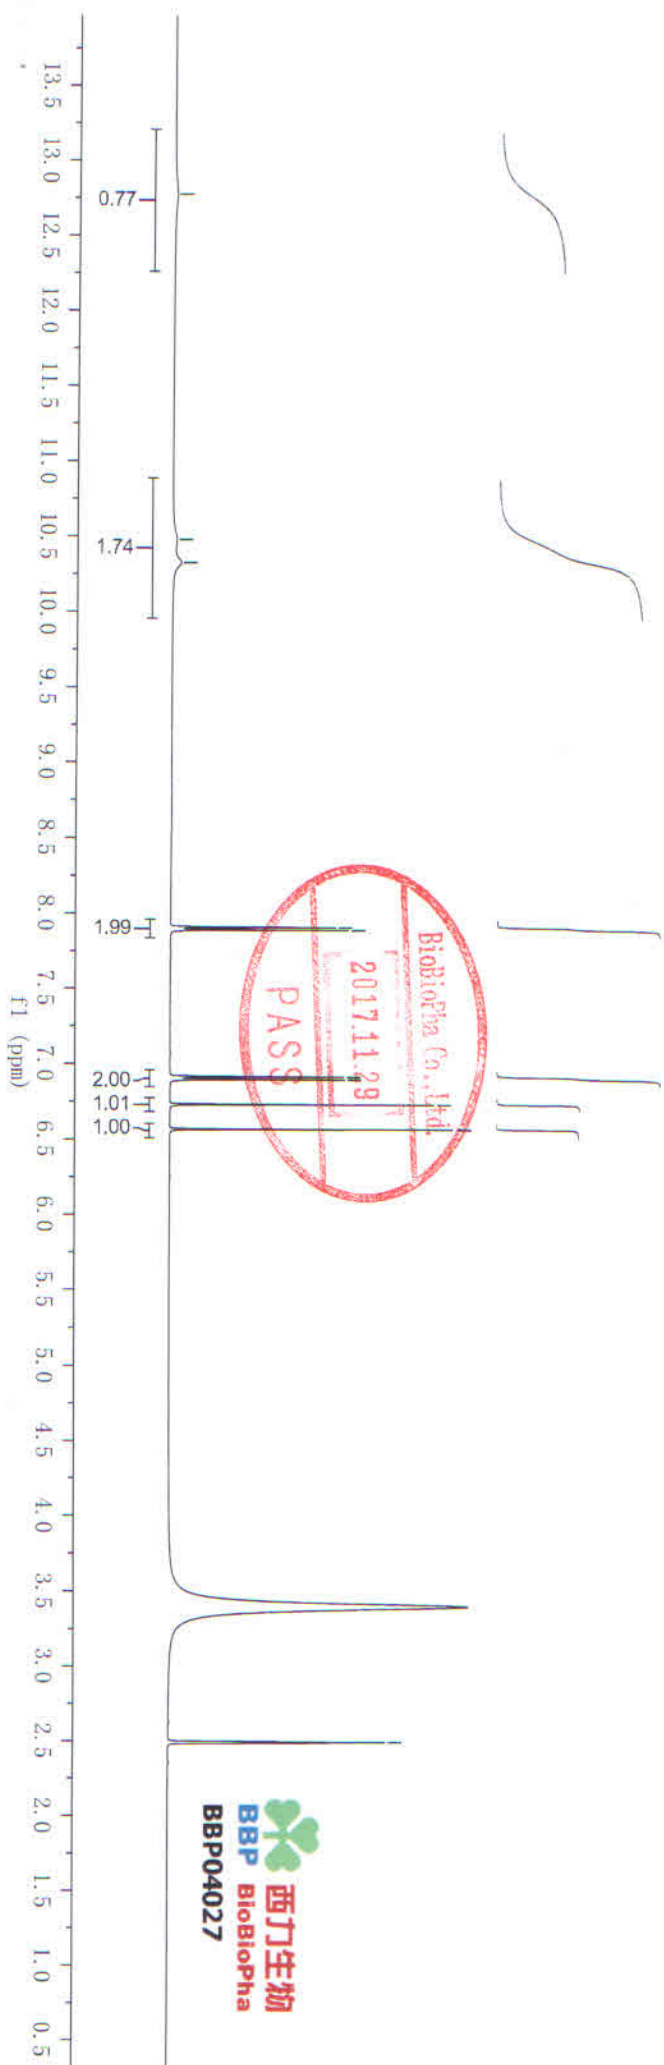

Supplement: s1 [file s1]
