# Supplementary material for: Dual Effect of Glucuronidation of a Pyrogallol-Type Phytophenol Antioxidant: A Comparison between Scutellarein and Scutellarin
Source: MDPI journal article supplement (doi:10.3390/molecules23123225), 2018-12-06
Supplement: s1 [file s1]

Suppl. 1 Dose response curves Figure S1-S5

## Dual Effect of Glucuronidation towards Antioxidant Pyrogallol-pattern Phytophenol: A Comparison between Scutellarein and Scutellarin

Qianru Liu <sup>1,2,†</sup>, Xican Li <sup>1,2,†,\*</sup>, Xiaojian Ouyang <sup>1,2</sup>, and Dongfeng Chen <sup>3,4,\*</sup>

<sup>1</sup> School of Chinese Herbal Medicine; Guangzhou University of Chinese Medicine, Guangzhou 510006, China. E-mails: liuqianru2333@163.com (L.Q);

<sup>2</sup> Innovative Research & Development Laboratory of TCM; Guangzhou University of Chinese Medicine, Guangzhou 510006, China.

<sup>3</sup> School of Basic Medical Science, Guangzhou University of Chinese Medicine, Guangzhou, China, 510006

<sup>4</sup> The Research Center of Basic Integrative Medicine, Guangzhou University of Chinese Medicine, Guangzhou, China, 510006. E-mail: chen888@gzucm.edu.cn (D.C.)

\* Correspondence: lixc@gzucm.edu.cn (X.L.); lixican@126.com (X.L.); chen888@gzucm.edu.cn (D.C.)  
Tel: +86-20-39358076; Fax: +86-20-38892690

<sup>†</sup> These authors contributed equally to this work.

**Note:** This Supporting information provides the original data of **Table 1** in the main text. All data underline are mentioned in **Table 1** in the main text.

## 1. DPPH•-scavenging assay

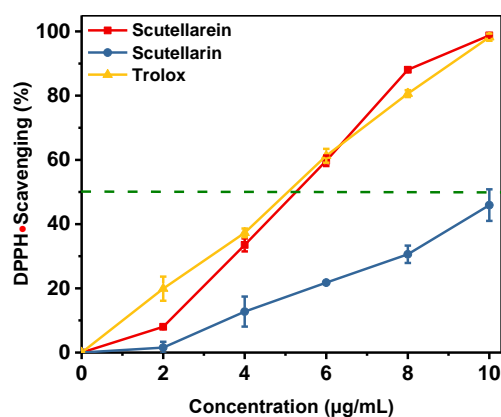

Figure S1: The dose response curves of scutellarein and scutellarin in DPPH•-scavenging assay. Each value is expressed as mean  $\pm$  SD (n = 3).

Tab. S1 The comparison of IC<sub>50</sub> values of scutellarein and scutellarin and positive control in DPPH•-scavenging assay.

|              | Mean $\pm$ SD<br>$\mu$ g/mL | Mean $\pm$ SD<br>$\mu$ M    |
|--------------|-----------------------------|-----------------------------|
| scutellarein | 5.4 $\pm$ 0.0               | 18.7 $\pm$ 0.1 <sup>a</sup> |
| scutellarin  | 11.2 $\pm$ 0.8              | 24.2 $\pm$ 1.7 <sup>b</sup> |
| Trolox       | 5.0 $\pm$ 0.1               | 20.2 $\pm$ 0.5 <sup>a</sup> |

IC<sub>50</sub> value was defined as the concentration of 50% superoxide anion radical inhibition and calculated by linear regression which was analyzed by Origin 6.0 professional software. Means values with different superscripts in the same column are significantly different (p<0.05).

## 2. ABTS•-scavenging assay

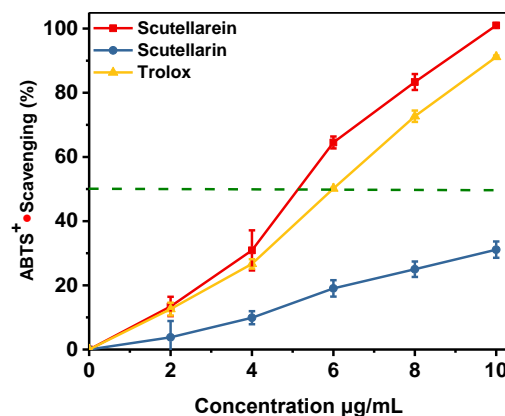

Figure S2: The dose response curves of scutellarein and scutellarin in ABTS•-scavenging assay. Each value is expressed as mean  $\pm$  SD (n = 3).

Tab. S2 The comparison of IC<sub>50</sub> values of scutellarein and scutellarin and positive control in ABTS<sup>•+</sup>-scavenging assay.

|              | Mean±SD<br>μg/mL | Mean±SD<br>μM                  |
|--------------|------------------|--------------------------------|
| scutellarein | 5.2 ± 0.3        | <u>18.3 ± 1.2</u> <sup>a</sup> |
| scutellarin  | 15.4 ± 1.3       | <u>33.3 ± 2.9</u> <sup>c</sup> |
| Trolox       | 5.9 ± 0.1        | <u>23.7 ± 0.4</u> <sup>b</sup> |

IC<sub>50</sub> value was defined as the concentration of 50% superoxide anion radical inhibition and calculated by linear regression which was analyzed by Origin 6.0 professional software. Means values with different superscripts in the same column are significantly different (p<0.05).

### 3. PTIO<sup>•+</sup>-scavenging assay

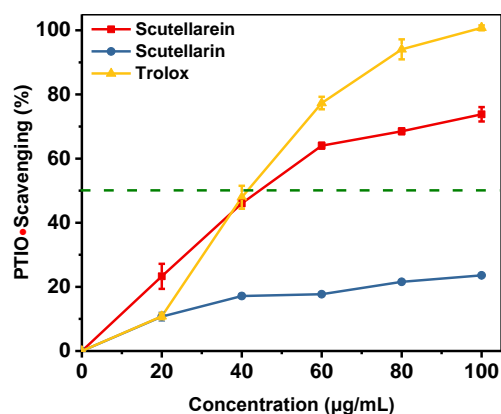

Figure S3: The dose response curves of scutellarein and scutellarin in PTIO<sup>•+</sup>-scavenging assay. Each value is expressed as mean ± SD (n = 3).

Tab. S3 The comparison of IC<sub>50</sub> values of scutellarein and scutellarin and positive control in PTIO<sup>•+</sup>-scavenging assay.

|              | Mean±SD<br>μg/mL | Mean±SD<br>μM                    |
|--------------|------------------|----------------------------------|
| scutellarein | 50.8 ± 2.2       | <u>177.5 ± 7.8</u> <sup>a</sup>  |
| scutellarin  | 266.9 ± 34.8     | <u>577.2 ± 75.4</u> <sup>b</sup> |
| Trolox       | 46.5 ± 2.3       | <u>185.7 ± 9.0</u> <sup>a</sup>  |

IC<sub>50</sub> value was defined as the concentration of 50% superoxide anion radical inhibition and calculated by linear regression which was analyzed by Origin 6.0 professional software. Means values with different superscripts in the same column are significantly different (p<0.05).

4.  $\text{Cu}^{2+}$ -reducing power assay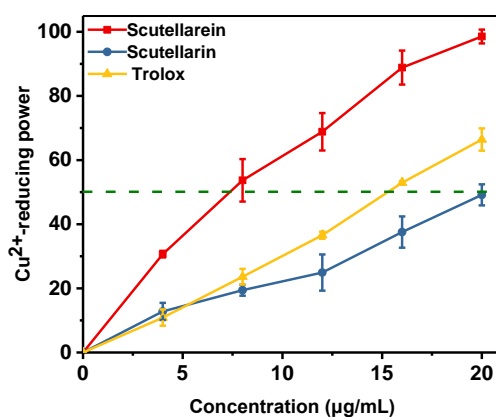

Figure S4: The dose response curves of scutellarein and scutellarin in  $\text{Cu}^{2+}$ -reducing power assay. Each value is expressed as mean  $\pm$  SD ( $n = 3$ ).

Tab. S4 The comparison of  $\text{IC}_{50}$  values of scutellarein and scutellarin and positive control in  $\text{Cu}^{2+}$ -reducing power assay.

|              | Mean $\pm$ SD<br>$\mu\text{g/mL}$ | Mean $\pm$ SD<br>$\mu\text{M}$ |
|--------------|-----------------------------------|--------------------------------|
| scutellarein | $9.6 \pm 0.4$                     | $33.5 \pm 1.4^a$               |
| scutellarin  | $20.1 \pm 0.7$                    | $43.4 \pm 1.5^b$               |
| Trolox       | $15.4 \pm 0.5$                    | $61.5 \pm 2.0^c$               |

$\text{IC}_{50}$  value was defined as the concentration of 50% superoxide anion radical inhibition and calculated by linear regression which was analyzed by Origin 6.0 professional software. Means values with different superscripts in the same column are significantly different ( $p < 0.05$ ).

5. Superoxide anion ( $\bullet\text{O}_2^-$ ) scavenging assay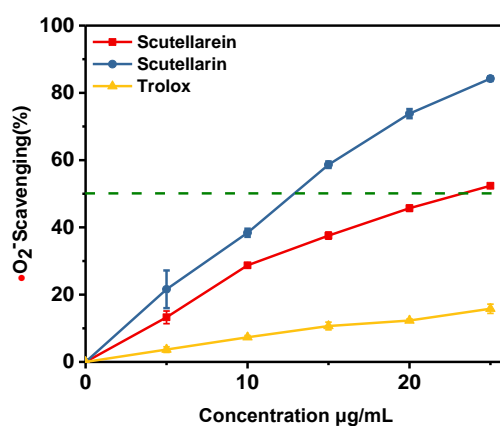

Figure S5: The dose response curves of scutellarein and scutellarin in Superoxide anion ( $\bullet\text{O}_2^-$ ) scavenging assay. Each value is expressed as mean  $\pm$  SD ( $n = 3$ ).

Tab. S5 The comparison of IC<sub>50</sub> values of scutellarein and scutellarin and positive control in Superoxide anion ( $\bullet\text{O}_2^-$ ) scavenging assay.

|              | Mean±SD<br>μg/mL | Mean±SD<br>μM                    |
|--------------|------------------|----------------------------------|
| scutellarein | 22.6 ± 0.2       | <u>79.0 ± 0.5</u> <sup>b</sup>   |
| scutellarin  | 13.3 ± 0.6       | <u>28.8 ± 1.4</u> <sup>a</sup>   |
| Trolox       | 83.4 ± 11.6      | <u>291.5 ± 40.6</u> <sup>c</sup> |

IC<sub>50</sub> value was defined as the concentration of 50% superoxide anion radical inhibition and calculated by linear regression which was analyzed by Origin 6.0 professional software. Means values with different superscripts in the same column are significantly different (p<0.05).
